# Supplementary material for: Exploring the catalytic activity of Nb4C3Tx MXene towards the degradation of nitro compounds and organic dyes by in situ decoration of palladium nanoparticles
Source: Royal Society of Chemistry journal article supplement (doi:10.1039/d2nj02315f), 2022-01-01
Supplement: d2nj02315f1.pdf [file d2nj02315f1.pdf]

## Exploring the catalytic activity of Nb<sub>4</sub>C<sub>3</sub>T<sub>x</sub> MXene towards degradation of nitro compounds and organic dyes by *in situ* decoration of palladium nanoparticles

Neermunda Shabana<sup>a</sup>, Ajith Mohan Arjun<sup>b</sup>, P Abdul Rasheed<sup>a,b\*</sup>

<sup>a</sup>Department of Chemistry, Indian Institute of Technology Palakkad, Palakkad, Kerala, India-678 557

<sup>b</sup>Department of Biological Sciences and Engineering, Indian Institute of Technology Palakkad, Palakkad, Kerala, India-678 557

\* [abdulrasheed@iitpkd.ac.in](mailto:abdulrasheed@iitpkd.ac.in) (PAR)

### Supporting Information

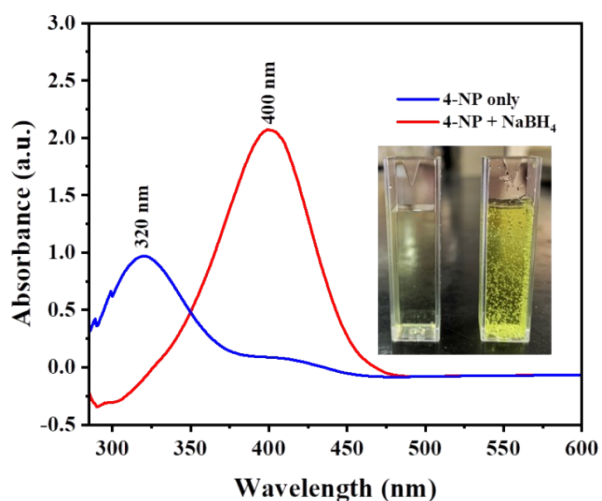

Fig. S1. The UV-Vis spectrum of the solution containing 4-NP and after the addition of NaBH<sub>4</sub>.

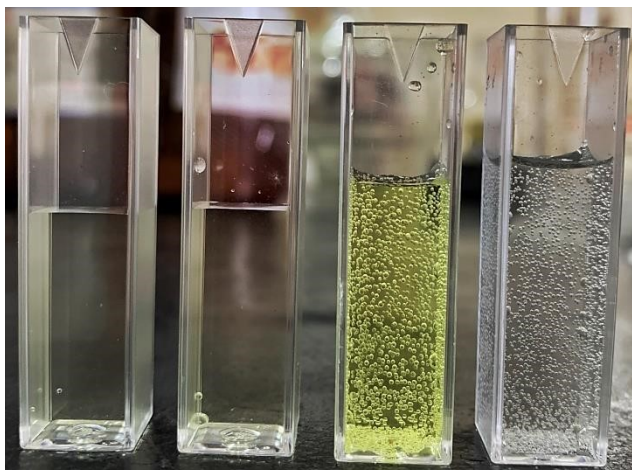

Fig. S2. The color change, which occurred during each step of the reaction. The first, second, and third photograph show the initial 4-NP solution, solution after adding the catalyst, and after adding  $\text{NaBH}_4$ , respectively. The last photograph shows the complete catalytic reduction (disappearance of color) after 3 min.

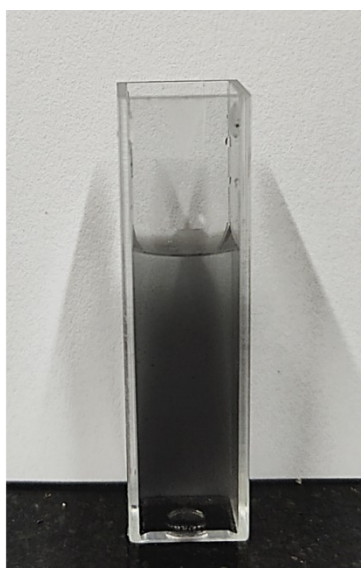

PdNPs before reaction

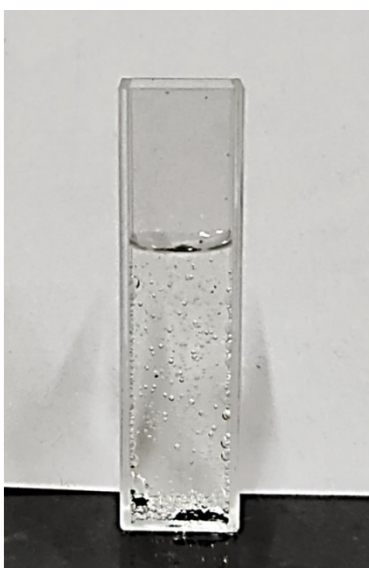

PdNPs after reaction

Fig. S3. The photographs of the PdNPs solution before and after the catalytic reaction

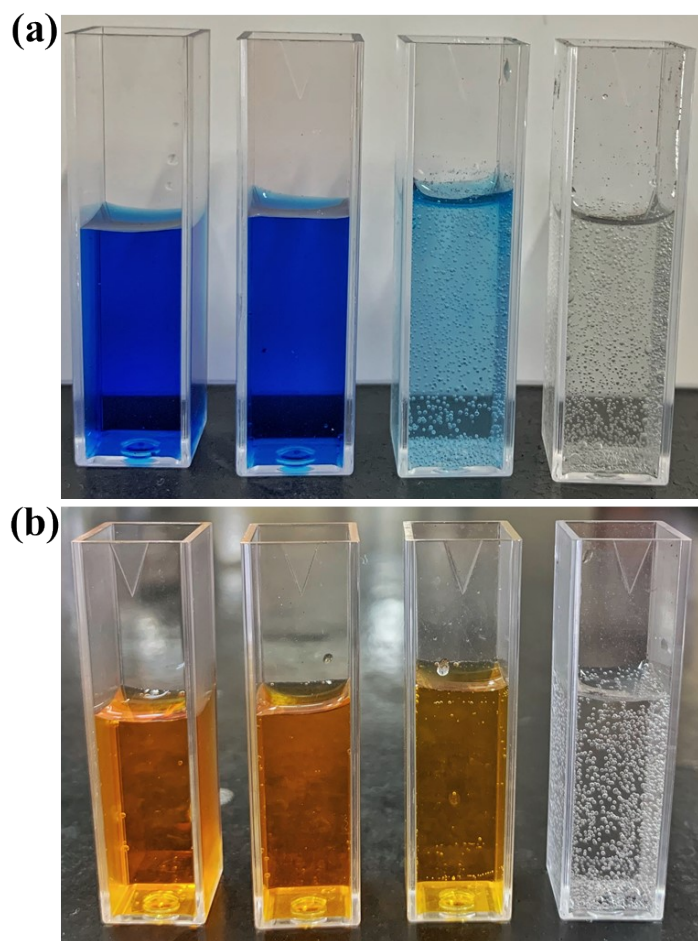

Fig. S4. The colour change, which occurred during each step of the reaction. First photograph in each panel shows the initial MB or MO solutions. Second photograph is after adding the catalyst and third photograph is after adding  $\text{NaBH}_4$ . The last photograph in each panel shows the complete catalytic reduction (disappearance of colour) after 3 min.
